## Bilingual speakers' enhanced monitoring can slow them down

Roksana Markiewicz<sup>1</sup>, Ali Mazaheri<sup>1,2</sup>, Andrea Krott<sup>1,2</sup>

<sup>1</sup> School of Psychology, University of Birmingham, UK

<sup>2</sup> Centre for Human Brain Health, University of Birmingham, UK

## **Abstract**

Performance differences between bilingual and monolingual participants on conflict tasks can be affected by the balance of various sub-processes such as monitoring and stimulus categorisation. Here we investigated the effect of bilingualism on these sub-processes during a conflict task with medium monitoring demand. We examined the behavioural and evoked potentials from a group of bilingual and monolingual speakers during a flanker task with 25% incongruent trials. We analysed behavioural differences by means of averaged response times and ex-Gaussian analyses of response time distributions. For the evoked potentials we focused on the N2 (implicated to be involved in monitoring) and P300 (implicated to be involved in categorisation) responses. We found that bilinguals had significantly longer response distribution tails compared to monolinguals. Additionally, bilinguals exhibited a more pronounced N2 and smaller P3 components compared to their monolingual counterparts, independent of experimental condition, suggesting enhanced monitoring processes and reduced categorisation effort. Importantly, N2 amplitudes were positively and P3 amplitudes were negatively related to the length of response distribution tails. We postulate that these results reflect an overactive monitoring system in bilinguals in a task of medium monitoring demand. This enhanced monitoring leads to less effortful categorisation, but also occasionally to slow responses. These results suggest that changes of the cognitive control system due to bilingual experience changes the balance of processes during conflict tasks, potentially leading to a small behavioural disadvantage.

**Keywords:** bilingual advantage, conflict tasks, N2, P3, conflict monitoring

## Introduction

Speaking another language leads to changes in brain structure and function, particularly in the networks implicated in cognitive control (Li et al., 2014; Pliatsikas & Luk, 2016).

Consequently, differences have been found between monolingual and bilingual speakers in tasks of executive control, with many studies finding superior behavioural performance for bilinguals (Bialystok et al., 2004; Costa et al., 2008; Emmorey et al., 2008; Hernández et al., 2010; review in Bialystok et al., 2012; meta-analyses in Donnelly et al., 2019; Grundy, 2020). However, other studies have found similar performance in the two participant groups or even superior performance in monolinguals (Duñabeitia et al., 2014; Gathercole et al., 2014; Naeem et al., 2018; Paap et al., 2015; review in Nichols et al., 2020; meta-analysis in Lehtonen et al., 2018). Together these findings suggest that structural and functional changes brought about by bilingualism lead to differences in cognitive processing, but this is not always reflected in a behavioural advantage. Importantly, cognitive control tasks contain a number of processes. Functional and structural changes might affect these processes in different ways. They might make bilinguals more efficient in some and potentially less efficient in other processes involved in a task.

Structural and functional changes due to speaking another language are complex and manifold, and not yet fully understood (Costa & Sebastián-Gallés, 2014; Grundy, Anderson, et al., 2017; Li et al., 2014; Pliatsikas & Luk, 2016). The recent unifying framework of current models of neuroplastic adaptations to bilingualism, the Unifying the Bilingual Experience Trajectories (UBET) model (DeLuca et al., 2020), lists increased grey matter volume, greater white matter integrity, and enhanced functional connectivity between regions of the brain in bilinguals. Furthermore, in terms of functional changes, bilinguals engage neural resources in different ways. Functional magnetic resonance imaging (fMRI) studies show that bilinguals tend to use more subcortical and posterior brain regions than anterior regions, suggesting that in cognitively demanding situations, bilinguals typically do not engage frontal cognitive control areas as much as monolinguals (Grundy, Anderson, et al., 2017).

Neural changes in bilinguals have been explained by the notion that the two languages of a bilingual speaker are constantly active (Colomé, 2001; Spivey & Marian, 1999). Bilinguals must therefore continually manage and resolve cross-linguistic activations, leading to high demands on conflict monitoring and selective attention (Marian & Spivey, 2003; Martin et

al., 2009; Wu & Thierry, 2013). A multitude of evidence shows that verbal and non-verbal tasks engage overlapping brain networks (Abutalebi & Green, 2016; Pliatsikas & Luk, 2016). The additional demands on language control processes can therefore explain the multitude of structural and functional changes in the brain.

One feature of executive function tasks that has to date not much been considered as a potential source of inconsistencies in the literature is that they always involve more than one process, such as monitoring or categorisation. If bilinguals are more efficient in some processes and less efficient in others, then the balance of engagement of these processes in a particular task could affect behavioural differences between bilinguals and monolinguals. If a process in which bilinguals are more efficient dominates in a particular task, then bilinguals will outperform monolinguals. If a process in which bilinguals are more efficient is balanced with a process in which they are less efficient, the cost and benefits of the processes might cancel each other out and there will be no performance difference between the participant groups. And finally, if a process dominates in which bilinguals are less efficient, then monolinguals might outperform bilinguals. The balance of processes involved in a task might therefore potentially explain inconsistencies in the literature.

One very common cognitive control task, and one that we used in the present study, is the flanker task (Eriksen & Eriksen, 1974). In this task, participants are typically presented with rows of arrows and need to indicate by button presses whether the central arrow points to the left or right. The flanking arrows are either congruent with the central arrow (pointing into the same direction as the target arrow) or incongruent (pointing into the opposite direction of the target arrow). The incongruent condition creates a response conflict that needs to be resolved. It therefore leads to longer response times and more errors.

Some previous studies have found superior performance of bilinguals compared to monolinguals on the flanker task (Abutalebi et al., 2015; Costa et al., 2008, 2009; Emmorey et al., 2008), while others reported no significant differences between the two language groups (Antón et al., 2019; Grundy, Chung-Fat-Yim, et al., 2017; Kousaie & Phillips, 2012, 2017; Luk et al., 2010). Furthermore, the mixture of congruent and incongruent trials makes a difference (Costa et al., 2009). Superior bilingual performance seems to only occur when incongruent trials occur with a high (50%) or medium (25%) probability, not when one type of trial (congruent or incongruent) dominates (92%). Since these versions of the task differ in terms of the necessary degree of conflict monitoring, bilinguals seem to outperform

monolinguals only when monitoring is important for task performance. Thus, bilinguals might possess a more efficient monitoring system or engage their monitoring system more strongly than monolinguals. These results also suggest that not all executive function tasks will show group differences (see Ware et al., 2020). This depends instead on the exact task features.

It is common practice to assess performance on tasks investigating cognition, such as the flanker task, through averaged response times. This method has the disadvantage, though, that it cannot assess the involvement of different processes (e.g., monitoring, attention, inhibition, categorisation) involved in the task. One approach that partly addresses this limitation is to examine response time distributions instead of averaged response times. This has been done in the bilingual advantage literature with the means of ex-Gaussian analyses (Abutalebi et al., 2015; Calabria et al., 2011; Tse & Altarriba, 2012; Zhou & Krott, 2016). By utilising an ex-Gaussian analysis, it is possible to separate a measure of general processing speed from a measure of slow responses for a particular participant in a particular experimental condition. General processing speed is captured by the  $\mu$  parameter (the mean of the Gaussian part of the response distribution), and the extremeness and frequency of slow responses is reflected in the  $\tau$  parameter (a measure of both the mean and variance of the exponential part of the response distribution). While ex-Gaussian parameters do not reflect specific processes,  $\mu$  is commonly interpreted as reflecting automatic processes, while  $\tau$  is interpreted to reflect controlled processes such as attention demanding processes (see review in Matzke & Wagenmakers, 2009).

In conflict tasks,  $\mu$  has been found to be larger in conflict conditions compared to conditions without conflict (e.g. Heathcote et al., 1991; Kane & Engle, 2003; Spieler et al., 2000; Zhou & Krott, 2018). It has therefore been interpreted as reflecting differences in inhibitory control and response conflict (Heathcote et al., 1991; Kane & Engle, 2003; Spieler et al., 2000; Zhou & Krott, 2018). In contrast,  $\tau$  is generally not affected by conflicting information. It is often thought to reflect attentional control, with attention lapses leading to extremely slow responses and therefore larger  $\tau$  (Epstein et al., 2011; Hervey et al., 2006; Spieler et al., 1996). But slow responses could also have different reasons (Epstein et al., 2011). For instance, they might occur when monitoring processes are particularly strong. In other words, a response might be checked more carefully, for instance as an adjustment to previous incorrect responses.

Utilizing ex-Gaussian analyses to investigate effects of bilingualism in conflict tasks has suggested differences between language groups, particularly in terms of controlled processes. Bilingual speakers have been found to have smaller  $\mu$  and  $\tau$  (Abutalebi et al., 2015; Calabria et al., 2011) or only smaller  $\tau$  (Zhou & Krott, 2018). Smaller  $\tau$  (shorter response distribution tails) for bilinguals has been interpreted as an advantage in attentional control.

Differences in functional processing between monolingual and bilingual participants are rather difficult to determine merely on the basis of behavioural results, even when employing ex-Gaussian analyses. Brain imaging provides better methods for this purpose. Differences between monolingual and bilingual speakers in executive function tasks have therefore also been studied with fMRI and EEG. Abutalebi et al. (2012) found that bilingual speakers outperformed monolingual speaker in a flanker task, while showing less activity in the anterior cingulate cortex (ACC) than monolingual speakers. The ACC is an integral part of the cognitive control system and has been associated with conflict (Botvinick et al., 2004; Carter et al., 1998). Abutalebi and colleagues also found that activity in the ACC of bilingual participants correlated with behaviour in a flanker task. These results suggest that differences between bilinguals and monolinguals on the flanker task are strongly driven by the engagement of the ACC and are therefore due to more efficient monitoring processes. Similarly, Luk and colleagues (2010) found that bilinguals use different brain areas, that is, a wider network of areas, to deal with incongruent trials in a flanker task than monolingual speakers, suggesting that they engage a different network of brain areas for conflict control. This study confirms the importance of the ACC for bilingual interference control, as it was (among other areas) correlated with performance in conflict trials.

Previous EEG research into the bilingual advantage in conflict tasks has found differences particularly in the N2 and P3 components. The N2 component is a fronto-central negative deflection that peaks at around 200-300ms after stimulus onset (Grundy, Anderson, et al., 2017). Conditions that involve conflict, for instance incongruent trials in the flanker task, elicit a more prominent N2 response compared to conditions that are conflict-free (i.e. congruent trials) (Purmann et al., 2011; Veen & Carter, 2002; Wild-Wall et al., 2008; Yeung et al., 2004). But the congruency effect on N2 is dependent on the frequency of the incongruent trials in the flanker task. It only occurs when incongruent trials are infrequent (e.g., 25%), not when they are frequent (75%) (Purmann et al., 2011), suggesting that they only occur in case of an enhanced monitoring demand. A larger amplitude is thus associated with enhanced conflict monitoring or the devotion of earlier resources for conflict processing

(Folstein & Van Petten, 2008; Grundy, Anderson, et al., 2017; Kousaie & Phillips, 2012; Yeung & Cohen, 2006).

Bilinguals have often been found to show more pronounced or earlier N2 responses compared to monolinguals (Fernandez et al., 2013, 2014; Kousaie & Phillips, 2012, 2017; Morales et al., 2015; Moreno et al., 2014). More pronounced N2 components amongst bilinguals have been found particularly in Go/No Go and AX-CPT tasks (Fernandez et al., 2013, 2014; Morales et al., 2015; Moreno et al., 2014). N2 effects in bilinguals have also been found to be moderated by L2 proficiency, with higher L2 proficiency leading to more pronounced N2 components (Fernandez et al., 2013, 2014). In line with the interpretation of the N2 component, more prominent N2 amplitudes in bilinguals echo greater resource allocation to conflict monitoring and shorter N2 latencies suggest more automatic and faster monitoring. Both differences suggest that bilinguals rely on earlier processes than monolinguals during a conflict task, reflecting a more proactive approach (Grundy, Anderson, et al., 2017). The proactive approach has been related to bilinguals practice in language switching (Zhang et al., 2015). In contrast to the former studies, Kousaie and Phillips (2012, 2017) found more pronounced or earlier N2 amplitudes in monolinguals compared to bilinguals, the former for young adults in a Stroop task, the latter for older adults in a Simon task. The Stroop result could be due to the verbal nature of the task and therefore the diversion of resources to linguistic processes in bilinguals. But as the authors interpreted the results, smaller N2 amplitudes in bilinguals could mean less requirement for conflict monitoring in bilinguals to perform the task. Importantly, as mentioned above, the exact task features can affect group differences. It is therefore maybe not that surprising that different tasks and variations of tasks have led to different results.

The other ERP component relevant to the present study is the P3 component, a positive component. The P3 is thought to be the summation of activity widely distributed in the brain (Johnson, 1993). It has two subcomponents, often referred to as P3 (also called standard P3 or P3b) and P3a (also called novelty P3). The P3 has a centro-parietal distribution, is typically elicited during processes of decision making and associated with attentional resource allocation and stimulus categorisation, with shorter latencies associated with faster categorisation time (Kok, 2001; Polich, 2007) and larger amplitudes being proportional to the amount of attentional resources allocated (Kok, 2001; Wickens et al., 1983). The P3a has a frontal-central distribution and is thought to reflect engagement of attention, especially orienting and involuntary attention shifts. For the flanker task, it is the standard P3 that is

most relevant. Incongruent trials lead to larger and later P3 responses (Purmann et al., 2011; Wild-Wall et al., 2008). But, just like for N2 responses, this difference is dependent on the frequency of the incongruent trials. An amplitude difference only occurs when incongruent trials are infrequent (e.g., 25%), not when they are frequent (75%), and a peak latency difference is stronger in the infrequent condition (Purmann et al., 2011).

Again, differences in P3 between bilinguals and monolinguals seem to depend on the task. Bilinguals have been found to show greater P3 amplitudes (Kousaie & Phillips, 2017; Moreno et al., 2014) and/or shorter P3 latencies than monolinguals in conflict tasks (Barac et al., 2016; Kousaie & Phillips, 2012, 2017). In contrast, other studies showed the opposite language group effect, with bilinguals producing smaller P3 amplitudes during a Stroop task (Coderre et al., 2014) and a Simon task (Kousaie & Phillips, 2012). These findings taken together suggest whether bilinguals show a larger or smaller P3 response is quite task dependent.

The task dependency of changes to cognitive control in bilingual speakers is also evident in studies that manipulated language context during a conflict task. Wu and Thierry (2013) tested bilingual speakers on a flanker task in which flanker trials were interleaved with words from either one or both of the speakers' languages. They found reduced P3 amplitudes in the mixed language condition compared to the single language conditions. This effect was replicated by Jiao et al. (2020) who replaced the interleaved word comprehension task with an interleaved picture production task. This study found an additional increase in terms of the N2 component in the mixed condition. These results suggest that conditions of enhanced cognitive control increase bilinguals' N2 components and reduce their P3 responses. Increased N2 amplitudes suggest a stronger engagement of monitoring processes, while reduced P3 amplitudes suggest the devotion of less resources for conflict resolution processes, thus more efficient categorisation.

### **The present study**

The aim of the present study was to investigate differences in efficiency of sub-processes of cognitive control between monolingual and bilingual speakers. For that, we tested young adults on a flanker task. In order to detect group differences in automatic versus controlled processes, we examined next to traditional measures (averaged RTs and accuracy) also ex-Gaussian parameters. But more importantly, we investigated functional neural differences



between the two participant groups by studying event-related potentials (focussing on N2 and P3) during task performance.

Costa et al. (2009) found a bilingual advantage on a flanker task only when monitoring demand was medium or high. In the current study, we investigated group differences in a version with medium monitoring demand, that is, with 25% incongruent and 75% congruent trials. This version allows flexibility in monitoring and is therefore particularly suitable for finding group differences. Given previous results, we expected to see stronger bilingual monitoring reflected in enhanced N2 amplitudes. Jiao et al. (2020) had shown that stronger engagement of monitoring processes in bilinguals in a flanker task, that is increased N2 responses, go hand in hand with decreased P3 amplitudes. We therefore might also see decreased P3 amplitudes and thus more efficient categorisation in bilinguals compared to monolinguals. We did not have strong predictions about behavioural results. If bilinguals are, as previously suggested, particularly efficient in monitoring in the task, they might outperform monolinguals in terms of accuracy, RTs or responses distribution tails. However, with a relatively small percentage of incongruent trials (25%), strong bilingual engagement in monitoring might not be beneficial. In this case, we might not see group differences (Antón et al., 2019; Grundy, Chung-Fat-Yim, et al., 2017; Kousaie & Phillips, 2012, 2017; Luk et al., 2010) or even a monolingual advantage.

In order to investigate whether stronger or weaker engagement of sub-processes in the task is beneficial or not, we also correlated markers of neural group differences (e.g. N2 amplitudes) with ex-Gaussian parameters. Yeung and Nieuwenhuis (2009) had found that larger N2 amplitudes in a flanker task were correlated with slower responses. This means that a strong engagement of monitoring processes in bilinguals, reflected in larger N2 amplitudes, could potentially slow down their responses compared to monolinguals (larger  $\mu$  or  $\tau$  parameters), meaning that a strong engagement of monitoring might be a disadvantage (see above). On the other hand, more efficient categorisation, reflected in decreased P3 amplitudes, might counteract this disadvantage.

## **Method**

### ***Participants***

Seventy students of the University of Birmingham took part in the study. Participants were allocated to one of two language groups (monolinguals/bilinguals) (see classification criteria in Table 1) based on their responses to a Language History questionnaire (taken from Zhou &

Krott, 2018). 16 participants were excluded from the analysis due to: (a) EEG software malfunction ( $N=7$ ), (b) excessive EEG artefacts ( $N=5$ , rejected trials exceeded 30%), or (c) extremely slow responses ( $N=4$ , RT mean was 3SD above the mean of all participants). This led to 28 monolinguals and 26 bilinguals being included into analyses (see Table 2 for demographic information of participants). All had normal or corrected vision and no neurological impairments. Monolinguals matched their bilingual counterparts in age,  $t(52) = .59$ ,  $p > .05$ , and fluid intelligence, assessed via Raven's Standard Progressive Matrices (Raven, 1958),  $t(52) = .56$ ,  $p > .05$ .

Table 1. *Allocation criteria into monolingual and bilingual groups.*

| Monolinguals                                                                       | Bilinguals                                                          |
|------------------------------------------------------------------------------------|---------------------------------------------------------------------|
| a) No second language before age 7                                                 | a) Both L1 and L2 learnt before age 7                               |
| b) Language proficiency rating 4 or lower (out of 7) in L2 (or any other language) | b) Language proficiency rating above 5 (out of 7) in both L1 and L2 |
| c) Use of only L1 on a daily basis                                                 | c) Both L1 and L2 used on a daily basis                             |

Table 2. *Demographic information of participants.*

|                                                               | Monolinguals       | Bilinguals         |
|---------------------------------------------------------------|--------------------|--------------------|
| N (Male/Female)                                               | 28 (10/18)         | 26 (3/23)          |
| Mean Age in years ( <i>range, SD</i> )                        | 20.1 (18-24, 1.66) | 19.8 (18-28, 2.04) |
| Right handed/ left handed                                     | 24/4               | 26/0               |
| Mean age (years) of second language acquisition ( <i>SD</i> ) | 10.14 (2.91)       | 3.54 (2.8)         |
| Self-rated proficiency of L1 ( <i>SD</i> ) (range 0-7)        | 6.71 (0.42)        | 6.54 (0.65)        |
| Self-rated proficiency of L2 ( <i>SD</i> ) (range 0-7)        | 2.29 (0.76)        | 6.15 (0.92)        |
| Mean Raven's score ( <i>SD</i> )                              | 50.68 (5.12)       | 49.25 (9.04)       |

Notes. Handedness was measured using the Handedness questionnaire by Oldfield (1971).

Seven of the monolingual participants reported some knowledge of another language.

Participants gave informed consent, which followed the guidelines of the British Psychology Society code of ethics, and the experiment was approved by the Science, Technology, Engineering, and Mathematics (STEM) Ethical Review Committee of the University of Birmingham.

## ***Materials***

The flanker paradigm (Eriksen & Eriksen, 1974) was implemented using E-prime 2.0 (Psychology Software Tools, Pittsburgh, PA). Each trial consisted of five black arrows presented in the centre of a white computer screen, with the central arrow being the target and two flanking arrows on both sides functioning as distractors. Two types of trials were presented: (a) congruent trials (75% of all trials) which comprised of five arrows facing into the same direction and (b) incongruent trials (25% of all trials) which consisted of a central target arrow pointing to the opposite direction than the flankers.

## ***Procedure***

Participants first completed the Language History questionnaire (taken from Zhou & Krott, 2018) followed by the Handedness questionnaire (Oldfield, 1971), before taking part in the EEG experiment. For the latter, they sat in an isolated room, approximately 55cm from the computer monitor. Each trial began with the presentation of a fixation cross in the centre of the screen for 800ms, followed by a stimulus, which stayed on screen for 5000ms or until response. Each trial was followed by a blank screen for 500ms. Subjects indicated the direction of the target by pressing corresponding buttons on a Cedrus RB-834 response pad, which also recorded response times. The task comprised of 10 blocks of 96 trials, with an additional practice block (24 trials), taking approximately 35 minutes. Stimuli appeared randomly. Finally, participants completed the Standardised Progressive Matrices assessment (Raven, 1958) for which they were given a 25 minute time limit.

## ***EEG recording***

Continuous electrophysiological recordings were obtained using a 128-channel BioSemi Active Two EEG system. BioSemi electrodes are active electrodes with sintered Ag-AgCl tips/pallets. The 5-10 system (Oostenveld & Praamstra, 2001) was used for electrode positioning. External electrodes placed on the mastoids were used as reference electrodes for offline processing. The signal was amplified with a bandpass of .16-128 Hz using a Biosemi Active 2 AD-box, sampled at 512 Hz, and recorded using ActiView version 7.06 software.

## ***Data analysis***

### ***Behavioural analysis***

We analysed response times (RTs), accuracy, and ex-Gaussian parameters ( $\mu$  and  $\tau$ ). The accuracy rate was the percentage of correct responses. Responses below 200ms were treated as incorrect. RT and ex-Gaussian analyses were based on correct responses. Responses greater than 2SD from each participant's mean were removed from the RT analysis, but not from the ex-Gaussian analysis. Ex-Gaussian parameters  $\mu$  and  $\tau$  were determined for each participant for each condition (congruent and incongruent) using the QMPE software (Brown & Heathcote, 2003). The exit codes were below 32 for all parameter estimations, therefore they were considered trustworthy (in line with the QMPE software manual). The average number of search iterations was 7.09. RTs, accuracy, and ex-Gaussian parameters ( $\mu$  and  $\tau$ ) were analysed each with a mixed 2 (Language Group: monolingual vs. bilingual)  $\times$  2 (Condition: congruent vs. incongruent) analysis of variance.

### ***EEG analysis***

The EEG data pre-processing was performed with the means of EEGLAB 14.1.2b (Delorme & Makeig, 2004) and Fieldtrip toolbox 2018-07-16 (Oostenveld et al., 2011). EEG data were off-line filtered with a 0.1Hz high pass filter and a 30Hz low pass filter, referenced to the average of the mastoid electrodes and epoched from -2 to 2 seconds locked to the onset of the arrow array. Ocular artefacts in the data were removed based on the scalp distribution and time-course, using the independent component analysis (ICA) extended-algorithm in EEGLAB. Prior to the ICA, a Principal Component Analysis (PCA) was used to reduce dimensionality of the data to 15 components. The average number of removed components per participant was 1.33 ( $SD = .57$ ), with no difference in the number of components removed between the bilingual ( $M = 1.5$ ,  $SD = .65$ ) and monolingual ( $M = 1.21$ ,  $SD = .5$ ) group ( $t(52) = -1.82$ ,  $p > .05$ ). The Fieldtrip toolbox 2018-07-16 (Oostenveld et al., 2011) was used for trial removal. Our criteria for trial rejection were: trials with incorrect responses, trials with  $RT < 200\text{msec}$ , and trials with  $RT > 2SD$  from the mean of each participant. In addition, a manual visual artifact rejection summary method was used to remove trials (per electrode) with a maximum value  $< 200\mu\text{V}$ . The average percentage of rejected trials per participant included in the analysis was 16.0% ( $SD = 6.6$ ), with no significant difference in the number of trials removed between the bilingual ( $M = 15.96\%$ ,  $SD = 6.8$ ) and monolingual ( $M = 16.1\%$ ,  $SD = 6.45$ ) groups ( $t(52) = .08$ ,  $p > .05$ ).

### ***Event-Related Potentials (ERPs)***

We averaged the time-locked EEG activity of all valid trials (see above for removed trials) for congruent and incongruent conditions separately. The baseline correction used for the

ERP analysis was -200 ms to 0 prior to stimulus (arrow array) onset. We employed a non-parametric cluster-based permutation test (Maris & Oostenveld, 2007) as implemented in Fieldtrip to assess statistical differences of ERP amplitudes in the time window 0-1 s after stimulus onset between: (1) conditions collapsed across all participants (congruent vs incongruent), (2) groups for each condition (monolinguals vs. bilinguals on congruent condition; monolinguals vs. bilinguals on incongruent condition), and (3) groups for flanker effect (i.e. congruency effect in monolinguals vs. congruency effect in bilinguals). Specifically this approach involved conducting a t-test (dependent samples in the condition contrast, independent samples in the group contrast) for every point in the electrode by time plane, and clustering the t-stats in adjacent spatiotemporal points if they exceeded a threshold of  $p < .05$  (cluster-alpha). The cluster with a Monte Carlo  $p$ -value smaller than .025 was identified as significant (simulated by 1000 partitions), thus, showing a significant condition or group difference in amplitude. Probability values for each cluster were obtained by comparing it to a distribution using the Monte Carlo simulation method, in which the group (and equivalent condition) labels were randomly shuffled 1000 times and the maximum sum of the t-stat in the resulting clusters was measured. Here we considered clusters falling in the highest or lowest 2.5th percentile to be considered significant. The triangulation method was used to define a cluster (i.e. a cluster consisted of at least two significant neighbouring electrodes).

In order to investigate whether any group differences in ERPs related directly to behavioural differences, we conducted Pearson correlations of ERPs with ex-Gaussian parameters  $\mu$  and  $\tau$ .

## Results

### Behavioural results

Figure 1 shows the distributions of average RT (panel A), accuracy (panel B), and Ex-Gaussian parameters  $\mu$  (panel C) and  $\tau$  (panel D) of the flanker task for the two participant groups and the two conditions.

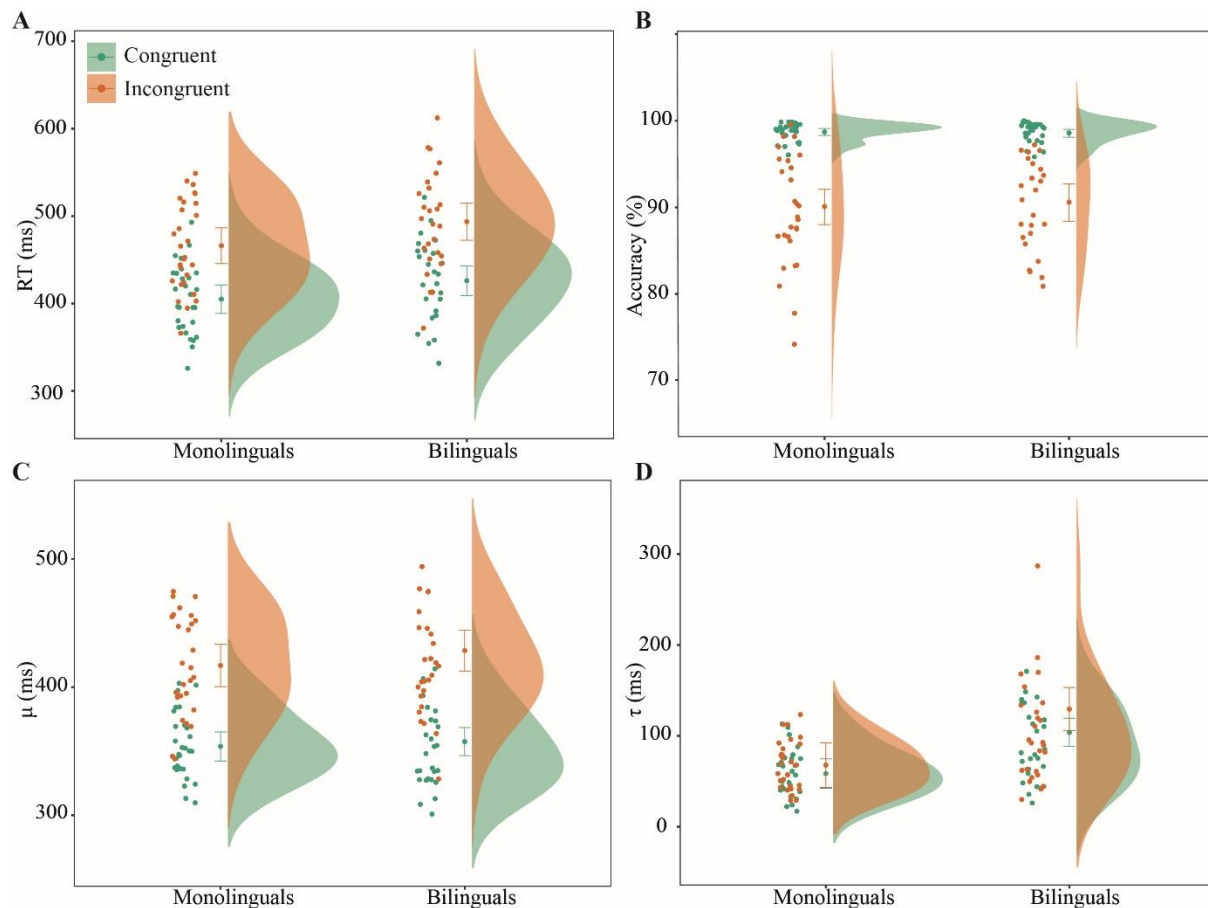

**Figure 1.** Distributions and means of RT (panel A), accuracy (panel B), Ex-Gaussian parameter  $\mu$  (panel C), and Ex-Gaussian parameter  $\tau$  (panel D) per condition (congruent and incongruent) in the flanker task for both monolinguals and bilinguals. Error bars represent 95% confidence intervals.

**RT.** We found a significant main effect of Condition,  $F(1,52) = 405.32, p < .001$ , indicating overall slower RTs in the incongruent compared to the congruent condition. There was a trend for a main effect of Language Group,  $F(1,52) = 3.53, p = .066$ , with bilinguals tending to have overall longer RTs compared to monolinguals. The interaction between Condition and Language Group was not significant,  $F(1,52) = .98, p = .327$ .

**Accuracy.** There was a significant main effect of Condition,  $F(1,52) = 142.63, p < .001$ , indicating overall lower accuracy in the incongruent compared to the congruent condition. There was no main effect of Language Group,  $F(1,52) = .05, p = .831$ , nor a Language Group by Condition interaction:  $F(1,52) = .22, p = .644$ .

**Ex-Gaussian  $\mu$**  There was a significant main effect of Condition,  $F(1,52) = 441.35, p < .001$ , indicating larger  $\mu$  in the incongruent compared to the congruent condition. There was no

main effect of Language Group,  $F(1,52) = .69, p = .411$ , nor a Language Group by Condition interaction,  $F(1,52) = .153, p = .222$ .

***Ex-Gaussian  $\tau$*** . There was a significant main effect of Condition,  $F(1,52) = 10.97, p = .002$ , indicating larger  $\tau$  (i.e. longer distribution tails) in the incongruent compared to the congruent condition. There was also a significant main effect of Language Group,  $F(1,52) = 1.88, p < .001$ , with bilinguals having overall larger  $\tau$  compared to monolinguals. The interaction between Condition and Language Group was not significant,  $F(1,52) = 2.36, p = .13$ .

## **EEG results**

### ***ERP condition differences***

Statistical analysis investigating ERP differences between congruent and incongruent trials revealed significant differences in the ERP waveform in time periods corresponding to the N2 and P300, as found previously (e.g., Bartholow et al., 2005; Purmann et al., 2011; Wild-Wall et al., 2008; Yeung et al., 2004), as well as a slow late component (see Figure 2A).

We observed the first significant difference around 200 to 400ms ( $p = .004$ ), maximal over central sites, with the incongruent condition leading to more pronounced negative amplitudes compared to the congruent condition. This corresponds to a condition difference at the N2 maximal between ~300 and 380ms. Second, there was a significant P3 difference around 390 to 790ms ( $p < .001$ ), maximal over central electrodes, with the incongruent condition leading to a bigger P3 component compared to the congruent condition. Third, we found a significant late condition difference from 840 to 1000ms ( $p = .004$ ), maximal over central (and posterior) sites, with the incongruent condition leading to a greater late negativity (compared to congruent trials).

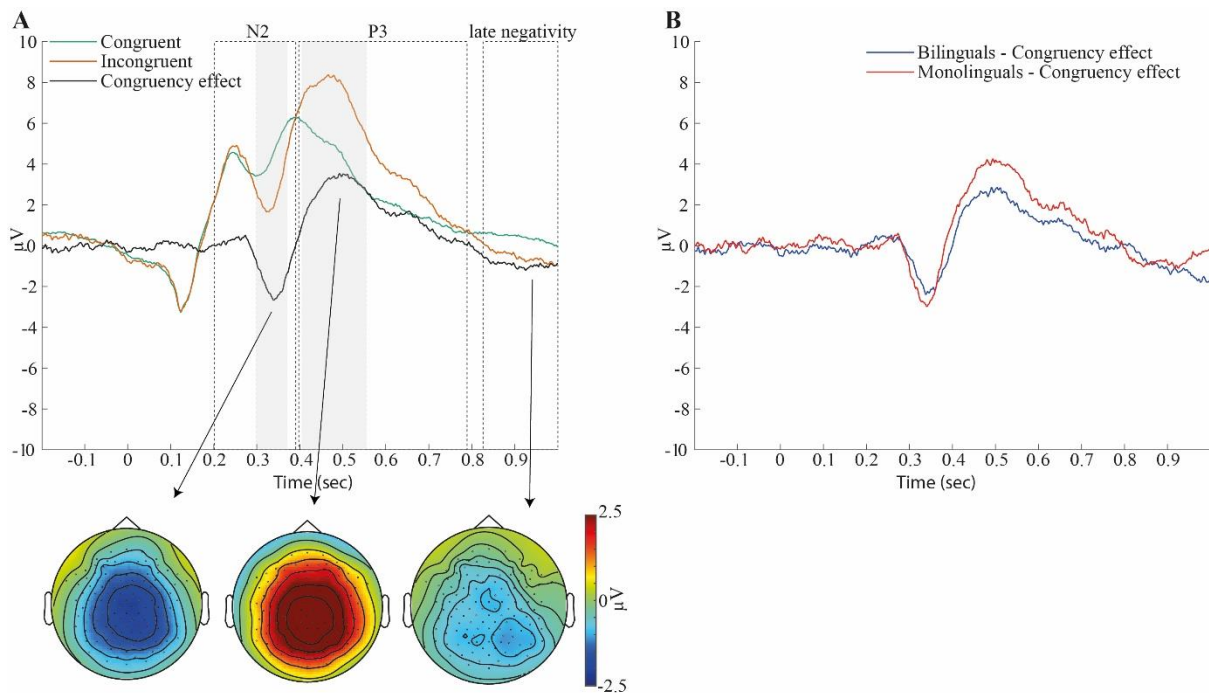

**Figure 2.** (A) Stimulus locked averaged ERPs for congruent trials (green), incongruent trials (orange) and the congruency effect (black) in the flanker task, averaged across all participants at the FCz channel. The dotted rectangles represent the time windows of the three significant between condition differences. The head plots illustrate the topographic distribution of these differences, averaged over the respective significant time window (note that the grey shading is purely for illustrative purposes centred around the N2 (300-380ms) and P3 (410-550ms) peaks with the topographic distribution matching the respective time windows). (B) Stimulus locked averaged ERP congruency effect (incongruent trials – congruent trials) for bilinguals (blue) and monolinguals (red) at the FCz site. While monolinguals appear to have a larger congruency effect at the P3 component than bilinguals, this difference was not significant.

### ***ERP language group differences***

The results of the non-parametric cluster-based permutation tests of ERP group differences (monolinguals vs. bilinguals) are shown in Figure 2B for the congruency effect (incongruent condition – congruent condition) and in Figure 3 for each condition (i.e. monolinguals vs. bilinguals for congruent condition and monolinguals vs. bilinguals for incongruent condition). The analysis showed no significant group differences for the congruency effect. However, we observed significant language group effects in both congruent and incongruent conditions. In the congruent condition, the cluster-based permutation test indicated that there was a significant effect of language group ( $p = .018$ ). We observed a difference in the ERP waveform between the two language group in a time interval encompassing the N2 and P3



components, extending from 220ms - 460ms. Within this time window, the N2 component (defined upon visual inspection between 275-325ms) was maximal over fronto-central sites, and the P3 component (defined upon visual inspection between 375-425ms) was maximal over fronto-central and right centro-parietal electrodes. The N2 was more pronounced in bilinguals compared to monolinguals and the P3 was less pronounced in bilinguals compared to monolinguals. In the incongruent condition, the cluster-based permutation test again indicated that there was a significant effect of language group ( $p = .014$ ). We observed a significant difference in the ERP waveform from around 240ms to 480ms. Within this time window, the N2 component (defined upon visual inspection between 325-375ms) was maximal over fronto-central site, and the P3 component (defined upon visual inspection between 425-475ms) was maximal over right fronto-temporal sites. Thus in both conditions, the N2 was more pronounced in bilinguals than in monolinguals and the P3 was smaller in bilinguals than in monolinguals.

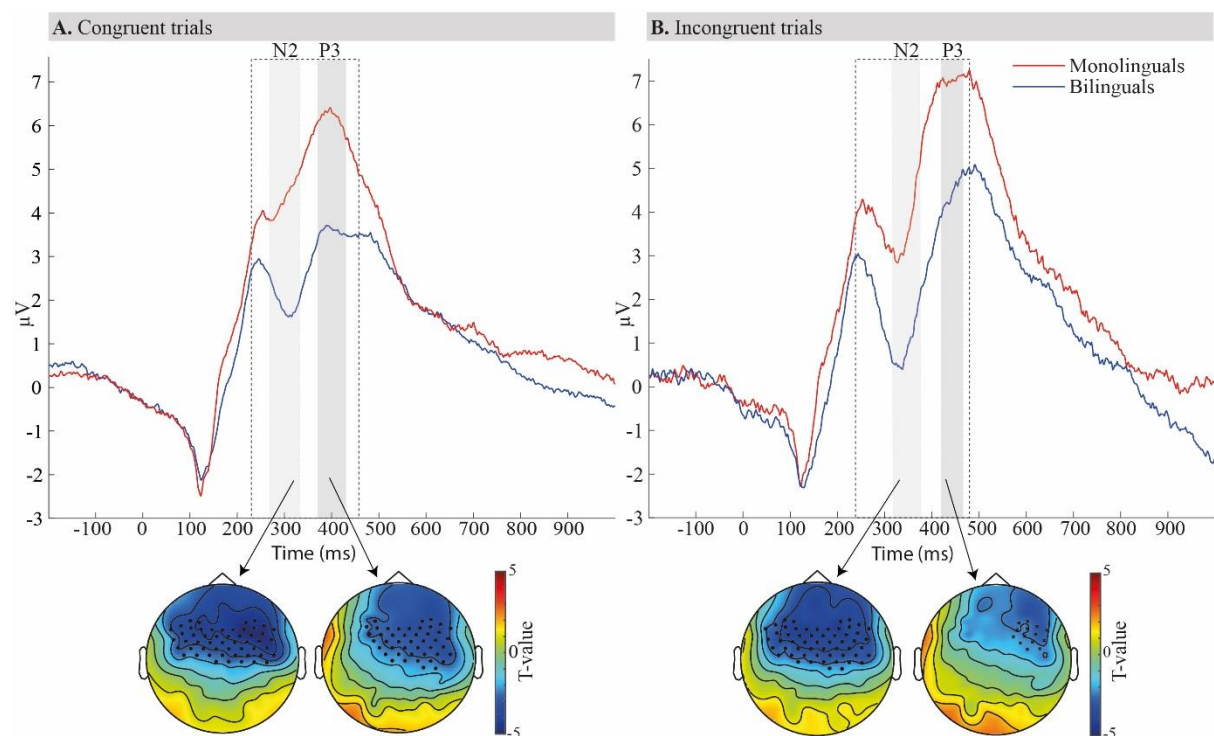

*Figure 3.* Stimulus locked averaged ERPs produced by (A) congruent trials and (B) incongruent trials in the flanker task for monolinguals (red) and bilinguals (blue). The dotted rectangles represent the time windows of the significant between-group differences for each condition. The ERP waveforms show averaged ERPs across the electrode clusters showing the maximal group difference in the specific time interval. The black dots in the topoplots illustrate the significant clusters of electrodes for group differences for the N2 and P3

components. The time windows for N2 and P3 components are shaded in grey and were defined based on visual inspection.

### ***Correlations between behavioural data and mean peak ERP amplitudes***

In order to investigate whether any group differences in ERPs were related to behavioural differences we assessed the relationships between the mean peak ERP amplitudes of N2 and P3 for each participant with their average ex-Gaussian  $\mu$  and ex-Gaussian  $\tau$  parameters in each condition (congruent and incongruent). For this analysis, we did not distinguish between monolingual and bilingual participants for reasons of statistical power.

The time windows of the N2 and P3 components were defined upon visual inspection of the ERP data. The time window used for calculating the mean peak amplitude of the N2 component was 275 to 325ms for the congruent condition and 325 to 375ms for the incongruent condition (see also Figure 3). The time window used for calculating the mean peak amplitude of the P3 component was 375 to 425ms for the congruent condition and 425 to 475ms for the incongruent condition (see also Figure 3). The electrodes used for calculating the mean peak amplitudes map onto the electrode clusters that revealed significant group differences in the N2 and P3 for congruent and incongruent conditions (marked as black dots in the topoplots in Figure 3).

Pearson's  $r$  results are shown in Figures 4 and 5. Due to multiple comparisons for each ERP component, we adjusted  $\alpha$  to  $.05/4 = .0125$ . Ex-Gaussian  $\tau$  correlated negatively with both N2 and P3 peak amplitudes in both conditions (although the correlation with N2 in the congruent condition was merely a trend with adjusted  $\alpha$ ), while ex-Gaussian  $\mu$  did not significantly correlate with any of the two ERP peaks. Since some relationships showed outliers, we also calculated Spearman's  $\rho$ . Results were very similar to those for Pearson  $r$ , apart from a trend for the correlation of  $\tau$  with P3 in the incongruent condition,  $\rho = -.23$ ,  $p = .098$ .

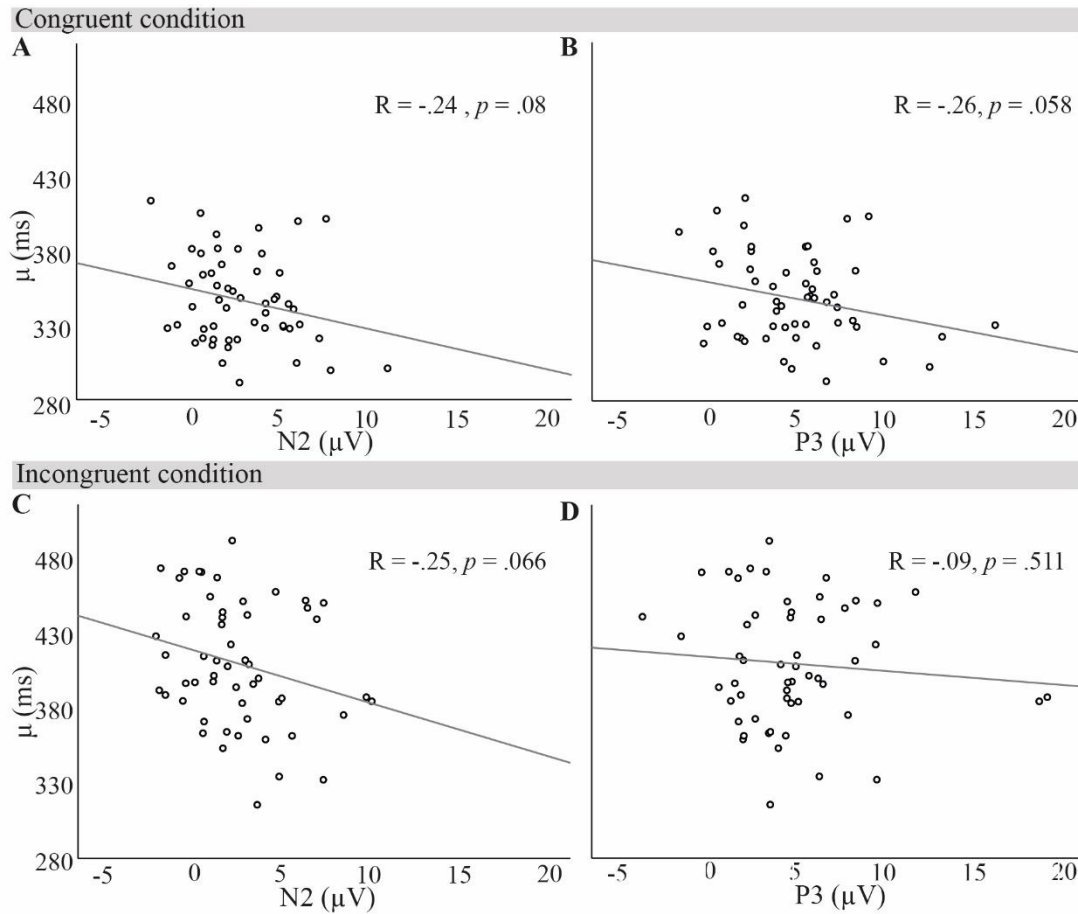

*Figure 4.* Relationships (Pearson  $r$ ) of  $\mu$  (ms) with mean N2 and P3 peak amplitudes ( $\mu$ V) in the congruent condition (panels A and B) and in the incongruent condition (panels C and D), collapsed over participant groups ( $N=54$ ). None of the relationships were significant ( $\alpha = .0125$ ).

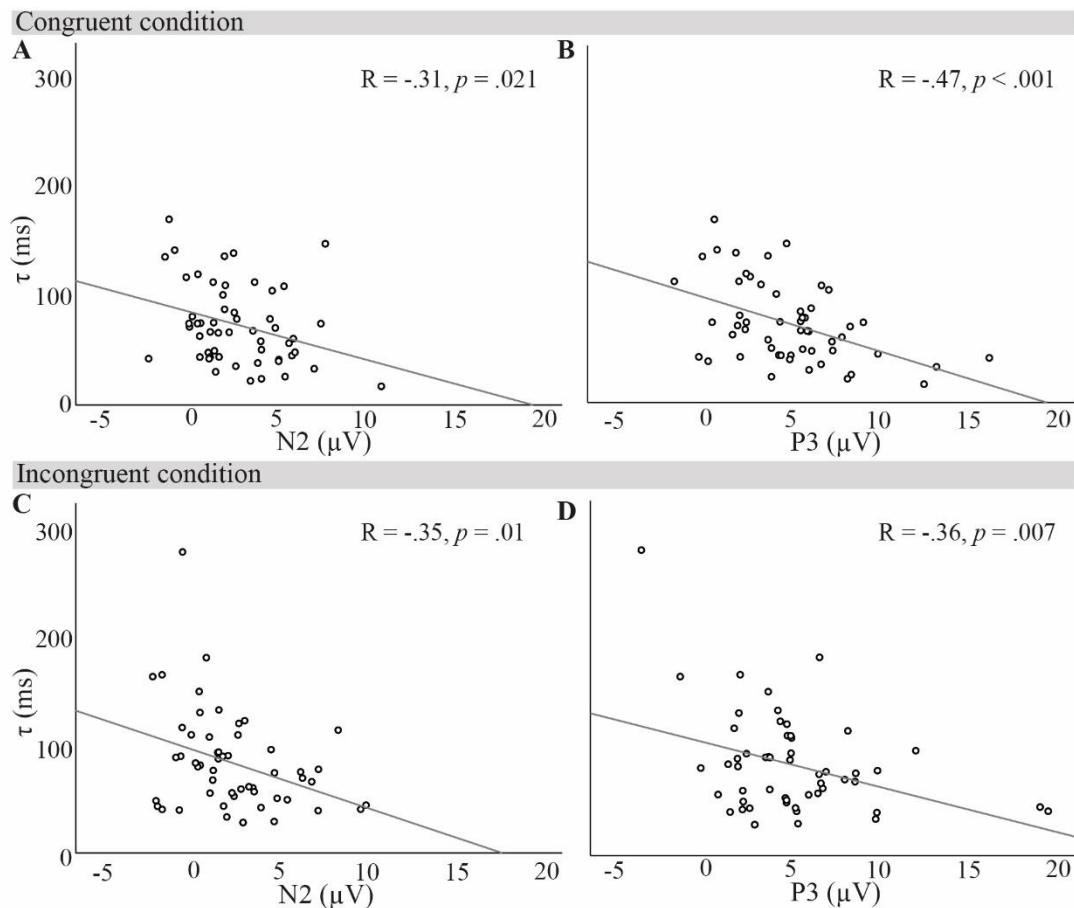

*Figure 5.* Relationships (Pearson  $r$ ) of  $\tau$  (ms) with mean N2 and P3 amplitudes ( $\mu\text{V}$ ) in the congruent condition (panels A and B) and in the incongruent condition (panels C and D), collapsed over participant groups ( $N=54$ ). Apart from a trend for a relationship with N2 in the congruent condition, all correlations were significant ( $\alpha = .0125$ ).

## Discussion

In the present study, we aimed to investigate differences in efficiency of sub-processes of cognitive control between monolingual and bilingual speakers. For that we examined the effect of bilingualism on behavioural and neural responses (ERPs) in a flanker task. We replicated the typical findings in this task with regard to behavioural and neural differences for congruent and incongruent conditions. We did not find any group differences in terms of congruency effects, neither for behavioural nor neural responses. We did, however, find that bilinguals had longer response distribution tails than monolinguals, independent of flanker type, also evident in a trend towards overall slower RTs in bilinguals. Bilinguals also exhibited more pronounced N2 and smaller P3 ERP components in response to both conditions compared to their monolingual counterparts. Furthermore, behavioural and ERP

responses were related in that larger N2 components and smaller P3 components were correlated with longer distribution tails.

### ***Behavioural data***

As expected, the flanker task produced typical behavioural congruency effects, with incongruent trials yielding longer RTs and lower accuracy rates compared to congruent trials. This reflects the interference from the incongruent flankers that required more conflict monitoring and conflict resolution (Eriksen & Eriksen, 1974). Furthermore, we examined the ex-Gaussian parameters  $\mu$  and  $\tau$  of the RT distributions to assess differences in automatic and controlled processes. In line with previous literature (Heathcote et al., 1991; Spieler et al., 1996; Zhou & Krott, 2018), incongruent trials produced larger  $\mu$  compared to congruent trials (in both language groups), reflecting an anticipated positive shift in response time distribution in the more demanding condition. Similar to the increase in averaged RT, the increased  $\mu$  corresponds with the additional processing cost associated with resolving conflict and active inhibitory mechanisms in the incongruent condition (Zhou & Krott, 2018). We also found that the incongruent condition was associated with larger  $\tau$  compared to the congruent condition (regardless of language group). The  $\tau$  parameter has been shown to be less affected by condition differences in conflict tasks (e.g., Aarts et al., 2009; Heathcote et al., 1991; Spieler et al., 2000), but a condition difference in  $\tau$  was found in, for instance, a flanker task by Zhou and Krott (2018).

In regard to group differences, bilingual and monolingual participants did not differ in terms of the bulk of the responses (reflected by  $\mu$ ), suggesting very similar response conflict efficiency across the groups (Zhou & Krott, 2018). However, bilinguals exhibited longer response time distribution tails than monolinguals, meaning they had more particularly long responses and more extreme responses than monolinguals (reflected in  $\tau$ ). This difference was independent of flanker condition, again suggesting that this difference is not related to conflict resolution processes. In terms of averaged RTs, these longer response distribution tails were reflected in a trend for overall slower responses in bilinguals compared to monolinguals. While ex-Gaussian parameters cannot be easily mapped onto particular processes, response time distribution tails have been associated with controlled processes (Matzke & Wagenmakers, 2009). In order to further determine what these controlled processes might be, it is important to take into account group differences in neural patterns and how behavioural measures relate to neural measures.

Note that the finding of longer response distribution tails in bilinguals is contrary to previous findings (Abutalebi et al., 2015; Calabria et al., 2011; Tse & Altarriba, 2012; Zhou & Krott, 2018). It is not clear how these differences occur. But again, it could be due to differences in experimental paradigms.

### ***Event related brain potential (ERP) data***

In line with previous studies (Kousaie & Phillips, 2012, 2017; Purmann et al., 2011; Veen & Carter, 2002; Wild-Wall et al., 2008), greater conflict monitoring demands emerging from the incongruent trials led to a significantly larger N2 component compared to the congruent condition (regardless of language group) over central sites. The N2 peaked between 320 and 380ms, which is in line with previous results for a very similar version of the flanker task as used here (Yeung et al., 2004). The N2 effect is quite central compared to other studies who reported more fronto-central effects. But the distribution is in line with the finding that the N2 is more central and less frontal when incongruent trials are rather infrequent as in our task (Bartholow et al., 2005). The larger amplitude in the incongruent condition has been associated with enhanced conflict monitoring and attention or the devotion of earlier resources for conflict processing (Bartholow et al., 2005; Folstein & Van Petten, 2008; Grundy, Anderson, et al., 2017; Grützmann et al., 2014; Kousaie & Phillips, 2012; Purmann et al., 2011; Tillman & Wiens, 2011; Yeung & Cohen, 2006), an interpretation supported by the findings that the N2 in the flanker task has been localised to the anterior cingulate cortex (ACC). Furthermore and as expected, the incongruent condition also elicited greater P3 amplitudes compared to the congruent condition (in line with, e.g., Kopp et al., 1996; Wild-Wall et al., 2008). Incongruent trials required extra processing due to the contradictory target and distractor information, meaning categorisation was more effortful.

Apart from congruency effects on the N2 and P3 components, we also observed a late negativity for incongruent trials from 840ms. To our knowledge, no previous flanker study has reported such an effect. Importantly, this effect occurred well after responses were given. It is therefore most likely that it reflects either retrospective monitoring processes or the increase of alertness after a challenging incongruent trial.

In regard to language group differences, we found that the N2 component was more pronounced in the bilingual group compared to the monolingual group at frontal-central sites in both congruent and incongruent conditions. In contrast, the P3 component over frontal temporal sites was significantly reduced for bilinguals compared to monolinguals, again

independent of condition. The N2 component in a flanker task has been shown to be sensitive to the frequency of conflict, with higher amplitudes for more frequent conflict (Grützmann et al., 2014; Purmann et al., 2011), suggesting that N2 reflects proactive control. Furthermore, bilinguals' N2 component in a flanker task is sensitive to general cognitive control demand in the task, with more pronounced N2s for flanker trials embedded in mixed language compared to single language contexts (Jiao et al., 2020). Our pattern of ERP results therefore suggests that bilingual speakers allocated greater resources to monitoring than monolingual speakers. Bilinguals thus resolve conflict earlier on, utilising a more proactive processing approach compared to monolinguals (Bartholow et al., 2005; DeLuca et al., 2020; Grundy, Anderson, et al., 2017; Tillman & Wiens, 2011). As a consequence of the proactive approach of bilinguals, fewer attentional resources for conflict control and categorising were devoted to the stimuli, reflected in the smaller frontal-central P3 component in bilingual compared to monolinguals speakers. The group effect on P3 was more frontal than the P3 effect caused by the incongruent flankers, resembling more a P3a. As the P3a has been associated with engagement of attention, it therefore seems to reflect less engagement of attention, especially orienting of attention (Kok, 2001), during conflict resolution and categorisation in bilingual speakers.

Our ERP results are compatible with various findings on conflict tasks. They are in line with findings for Go/No Go tasks, in which bilinguals had more pronounced N2 amplitudes compared to monolinguals in the No Go condition (despite the lack of behavioural performance differences) (Fernandez et al., 2013, 2014; Moreno et al., 2014), and in which higher L2 proficiency has been found to lead to larger N2 amplitudes (Fernandez et al., 2013, 2014). The combination of increased N2 and reduced P3 in our study is equivalent to what Jiao et al. (2020) had found for flanker trials embedded in a mixed language context, thus in a situation of enhanced executive control demand. Similarly, a reduced P3 in flanker trials had been reported for a mixed compared to a single language condition when participants did not have to produce, but to comprehend the language stimuli (Wu & Thierry, 2013). Furthermore, bilingual speakers have shown reduced P3 amplitudes compared to monolingual speakers in a Stroop task (Coderre et al., 2014) and a Simon task (Kousaie & Phillips, 2012). These results all suggest that bilinguals allocate less resources to conflict resolution and categorisation processes than monolingual speakers in a conflict task.

In contrast, Kousaie and Phillips (2012, 2017) found no or opposite patterns of group differences in ERPs. They did not find language group differences in N2 or P3 amplitudes in

a flanker task. Instead, they discovered the opposite N2 effect in a verbal Stroop task, with monolinguals showing a larger N2 than bilinguals. As noted, the results for the verbal Stroop task might be due to more resources being diverted to linguistic processes during the task. Finally, bilinguals showed greater instead of reduced P3 amplitudes in Stroop and Simon tasks. One remarkable difference between these two studies and the current study is that they included not only congruent and incongruent trials, but also 33% neutral trials. Since both N2 and P3 are very sensitive to executive function demands of a task, especially monitoring demands (Jiao et al., 2020; Purmann et al., 2011; Wu & Thierry, 2013), it is possible that the inclusion of neutral trials shifted the balance of monitoring and conflict resolution processes in the two participant groups. While the proportion of incongruent trials (25% in the current version and 33% in Kousaie and Philips' version) is quite similar, participants had to only monitor for incongruent flankers in Kousaie and Philips' studies when a stimulus actually included flankers (i.e. for incongruent and congruent trials). This might have changed bilinguals' proactive monitoring approach to a more reactive approach, thus one very similar to that of monolingual participants.

Proactive control is known to be generally more effective than reactive control (Braver, 2012) and therefore usually advantageous. However, bilinguals' proactive enhanced resource allocation to monitoring was not quite advantageous in the present study. As larger N2 amplitudes (and smaller P3 amplitudes) were related with longer distribution tails, their enhanced monitoring occasionally led to very long response times. Stronger monitoring might mean that responses are checked particularly thoroughly. This would mean that bilinguals over-engaged in monitoring in the current study. As mentioned, the relatively rare (25%) occurrence of incongruent trials might have activated the generally proactive monitoring approach in bilinguals, while monolinguals took a more reactive processing approach. The latter might have been slightly more beneficial, as evidenced in fewer extremely long responses in the monolingual group. In other words, bilinguals' more efficient conflict resolution and categorisation (reflected in reduced P3 amplitudes) was hampered by a hyper-activate monitoring system in the present task.

### ***The bilingual advantage in conflict tasks***

What do the current findings mean with regard to the debate about the bilingual advantage in conflict tasks? As mentioned, the current bilingual literature is equivocal in regard to language group differences in such tasks. Specifically, in the flanker task, some previous



studies have found that bilinguals are faster (Costa et al., 2008; Emmorey et al., 2008), and more accurate (Kousaie & Phillips, 2017) than monolinguals. Other studies have reported no significant RT differences between bilinguals and monolinguals (Antón et al., 2019; Grundy, Chung-Fat-Yim, et al., 2017; Kousaie & Phillips, 2012, 2017; Luk et al., 2010) or (similarly to our study) a small non-significant bilingual disadvantage (Paap & Greenberg, 2013; Paap & Sawi, 2014). Together these results suggest that there is no consistent advantage in flanker tasks, or more generally in conflict tasks (see Ware et al., 2020, who found that different tasks are more or less consistent in showing a bilingual advantage). An advantage likely only appears in conditions with the right balance of demands on sub-processes. If proactive monitoring is advantageous in a paradigm, bilinguals might process the conflict more efficiently and therefore more likely show a behavioural advantage. But, proactive conflict monitoring does not always lead to faster (or more accurate) responses. As we have seen in the current study, it can even backfire.

### **Individual differences**

While group differences in conflict tasks can be affected by task parameters, performance of bilinguals is also impacted by individual variations in bilingual experience. Language experiences such as intensity and diversity of L1 and L2 use, language switching in daily life, relative proficiency and duration of the two languages have varying consequences on control demands and lead to both structural and functional neural changes (see review in DeLuca et al., 2020). For instance, models of individual variation of bilingual experience onto structural and functional brain changes, predict less reliance on frontal areas with longer L2 use (DeLuca et al., 2020; Grundy, Anderson, et al., 2017). Not surprisingly, there are increasing calls to account for individual differences in bilingual experiences in the bilingual advantage literature (Poarch & Krott, 2019). The effect of such variations has indeed been shown in both the flanker task (Dong & Zhong, 2017; Hofweber et al., 2016) and in other tasks with a suppression component (Fernandez et al., 2013, 2014; Gullifer et al., 2018; Sullivan et al., 2014). For the flanker task, bilinguals who engage in more dense code-switching showed inhibitory advantages in a condition with medium monitoring demand (25% incongruent trials) (Hofweber et al., 2016); and interpreting experience heightens early attentional processing (larger N1), conflict monitoring (larger N2), and interference suppression (smaller P3 and smaller RT interference effect) (Dong & Zhong, 2017). L2 proficiency seems to particularly impact neural markers in a Go/No Go task, with higher proficiency leading to more pronounced N2 (Fernandez et al., 2013) and a six-month University Spanish course

(compared to a Psychology course) increasing the P3 component (Sullivan et al., 2014).

Furthermore, proactive and reactive control can be affected by different experiences. Gullifer et al. (2018) reported that greater diversity in language use in daily life was related with greater reliance on proactive control in an AX-Continuous performance task, while earlier L2 age of acquisition was associated with a decrease in reliance on proactive control. Future studies will therefore need to take into account not only task parameters, but also individual variations in bilingual experience.

To conclude, we have found that bilingual speakers showed evidence for enhanced proactive monitoring during a flanker task with medium monitoring demand compared to monolingual speakers. The enhanced monitoring was followed by less resources devoted to conflict resolution and stimulus categorisation, thus to less effortful categorisation. The monitoring system, however, was rather overactive as it led occasionally to very slow responses. Thus, while the processes of monitoring and categorisation more or less balanced each other out, the less efficient monitoring slightly dominated. These results demonstrate how the efficiency of sub-processes of a task together determine overall behavioural performance and can affect group differences. While there is currently a strong focus shift in the literature on how individual differences in bilingual experience might affect bilingual performance and therefore differences compared to monolingual speakers, we propose that the study of balance of sub-processes in conflict tasks is a complementary avenue that is useful to better understand any functional differences between bilingual and monolingual speakers.

## References

- Aarts, E., Roelofs, A., & van Turenout, M. (2009). Attentional control of task and response in lateral and medial frontal cortex: Brain activity and reaction time distributions. *Neuropsychologia*, *47*(2009), 2089–2099. <https://doi.org/10.1016/j.neuropsychologia.2009.03.019>
- Abutalebi, J., Della Rosa, P. A., Green, D. W., Hernández, M., Scifo, P., Keim, R., Cappa, S. F., & Costa, A. (2012). Bilingualism Tunes the Anterior Cingulate Cortex for Conflict Monitoring. *Cerebral Cortex*, *22*(9), 2076–2086. <https://doi.org/10.1093/cercor/bhr287>
- Abutalebi, J., & Green, D. W. (2016). Neuroimaging of language control in bilinguals: Neural adaptation and reserve. *Bilingualism: Language and Cognition*, *19*(4), 689–698. <https://doi.org/10.1017/S1366728916000225>
- Abutalebi, J., Guidi, L., Borsa, V., Canini, M., Della Rosa, P. A., Parris, B. A., & Weekes, B. S. (2015). Bilingualism provides a neural reserve for aging populations. *Neuropsychologia*, *69*, 201–210. <https://doi.org/10.1016/j.neuropsychologia.2015.01.040>
- Antón, E., Carreiras, M., & Duñabeitia, J. A. (2019). The impact of bilingualism on executive functions and working memory in young adults. *PLoS ONE*, *14*(2), 1–30. <https://doi.org/10.1371/journal.pone.0206770>
- Barac, R., Moreno, S., & Bialystok, E. (2016). Behavioral and Electrophysiological Differences in Executive Control Between Monolingual and Bilingual Children. *Child Development*, *87*(4), 1277–1290. <https://doi.org/10.1111/cdev.12538>
- Bartholow, B. D., Pearson, M. A., Dickter, C. L., Sher, K. J., Fabiani, M., & Gratton, G. (2005). Strategic control and medial frontal negativity : Beyond errors and response conflict. *Psychophysiology*, *42*, 33–42. <https://doi.org/10.1111/j.1469-8986.2005.00258.x>
- Bialystok, E., Craik, F. I. M., & Luk, G. (2012). Bilingualism: consequences for mind and brain. *Trends in Cognitive Sciences*, *16*(4), 240–250. <https://doi.org/10.1016/j.tics.2012.03.001>
- Bialystok, E., Klein, R., Craik, F. I. M., & Viswanathan, M. (2004). Bilingualism, aging, and cognitive control: Evidence from the Simon task. *Psychology and Aging*, *19*(2), 290–

303. <https://doi.org/10.1037/0882-7974.19.2.290>

- Botvinick, M. M., Cohen, J. D., & Carter, C. S. (2004). Conflict monitoring and anterior cingulate cortex: An update. *Trends in Cognitive Sciences*, 8(12), 539–546. <https://doi.org/10.1016/j.tics.2004.10.003>
- Braver, T. S. (2012). The variable nature of cognitive control: A dual-mechanisms framework Shifting the emphasis to variability in cognitive control. *Trends in Cognitive Sciences*, 16(2), 106–113. <https://doi.org/10.1016/j.tics.2011.12.010>.The
- Brown, S., & Heathcote, A. (2003). QMLE: Fast, robust, and efficient estimation of distribution functions based on quantiles. *Behavior Research Methods, Instruments, and Computers*, 35(4), 485–492. <https://doi.org/10.3758/BF03195527>
- Calabria, M., Hernández, M., Martin, C. D., & Costa, A. (2011). When the tail counts: the advantage of bilingualism through the ex-gaussian distribution analysis. *Frontiers in Psychology*, 2(250), 1–8. <https://doi.org/10.3389/fpsyg.2011.00250>
- Carter, C. S., Braver, T. S., Barch, D. M., Botvinick, M. M., Noll, D., & Cohen, J. D. (1998). Anterior cingulate cortex, error detection, and the online monitoring of performance. *Science*, 280(5364), 747–749. <https://doi.org/10.1126/science.280.5364.747>
- Coderre, E. L., Walter, J. B., & Heuven, V. (2014). Electrophysiological explorations of the bilingual advantage: Evidence from a Stroop task. *PLoS ONE*, 9(7). <https://doi.org/10.1371/journal.pone.0103424>
- Colomé, À. (2001). Lexical activation in bilinguals' speech production: Language-specific or language-independent? *Journal of Memory and Language*, 45(4), 721–736. <https://doi.org/10.1006/jmla.2001.2793>
- Costa, A., Hernández, M., Costa-Faidella, J., & Sebastián-Gallés, N. (2009). On the bilingual advantage in conflict processing: Now you see it, now you don't. *Cognition*, 113(2009), 135–149. <https://doi.org/10.1016/j.cognition.2009.08.001>
- Costa, A., Hernández, M., & Sebastián-Gallés, N. (2008). Bilingualism aids conflict resolution: Evidence from the ANT task. *Cognition*, 106(1), 59–86. <https://doi.org/10.1016/j.cognition.2006.12.013>
- Costa, A., & Sebastián-Gallés, N. (2014). How does the bilingual experience sculpt the brain? *Nature Reviews Neuroscience*, 15(5), 336–345. <https://doi.org/10.1038/nrn3709>

- Delorme, A., & Makeig, S. (2004). EEGLAB: An open source toolbox for analysis of single-trial EEG dynamics including independent component analysis. *Journal of Neuroscience Methods*, *134*(1), 9–21. <https://doi.org/10.1016/j.jneumeth.2003.10.009>
- DeLuca, V., Segaert, K., Mazaheri, A., & Krott, A. (2020). Understanding bilingual brain function and structure changes? U Bet! A Unified Bilingual Experience Trajectory model. *Journal of Neurolinguistics*, *56*(2020), 1–14. <https://doi.org/10.1017/CBO9781107415324.004>
- Dong, Y., & Zhong, F. (2017). Interpreting experience enhances early attentional processing, conflict monitoring and interference suppression along the time course of processing. *Neuropsychologia*, *95*, 193–203. <https://doi.org/10.1016/j.neuropsychologia.2016.12.007>
- Donnelly, S., Brooks, P. J., & Homer, B. D. (2019). Is there a bilingual advantage on interference-control tasks? A multiverse meta-analysis of global reaction time and interference cost. *Psychonomic Bulletin and Review*, *26*(4), 1122–1147. <https://doi.org/10.3758/s13423-019-01567-z>
- Duñabeitia, J. A., Hernández, J. A., Antón, E., Macizo, P., Estévez, A., Fuentes, L. J., & Carreiras, M. (2014). The inhibitory advantage in bilingual children revisited: Myth or reality? *Experimental Psychology*, *61*(3), 234–251. <https://doi.org/10.1027/1618-3169/a000243>
- Emmorey, K., Luk, G., Pyers, J. E., & Bialystok, E. (2008). The source of enhanced cognitive control in bilinguals: Evidence from bimodal bilinguals. *Psychological Science*, *19*(12), 1201–1206. <https://doi.org/10.1111/j.1467-9280.2008.02224.x>
- Epstein, J. N., Langberg, J. M., Rosen, P. J., Graham, A., Narad, M. E., Antonini, T. N., Brinkman, W. B., Froehlich, T., Simon, J. O., & Altaye, M. (2011). Evidence for Higher Reaction Time Variability for Children With ADHD on a Range of Cognitive Tasks Including Reward and Event Rate Manipulations. *Neuropsychology*, *25*(4), 427–441. <https://doi.org/10.1037/a0022155>
- Eriksen, B. A., & Eriksen, C. W. (1974). Effects of noise letters upon the identification of a target letter in a nonsearch task. *Perception & Psychophysics*, *16*(1), 143–149. <https://doi.org/10.3989/arbor.2000.i650.965>

- Fernandez, M., Acosta, J., Douglass, K., Doshi, N., & Tartar, J. L. (2014). Speaking two languages enhances an auditory but not a visual neural marker of cognitive inhibition. *AIMS Neuroscience*, *1*(2), 145–157. <https://doi.org/10.3934/Neuroscience.2014.2.145>
- Fernandez, M., Tartar, J. L., Padron, D., & Acosta, J. (2013). Neurophysiological marker of inhibition distinguishes language groups on a non-linguistic executive function test. *Brain and Cognition*, *83*, 330–336. <https://doi.org/10.1016/j.bandc.2013.09.010>
- Folstein, J. R., & Van Petten, C. (2008). Influence of cognitive control and mismatch on the N2 component of the ERP: A review. *Psychophysiology*, *45*(1), 152–170. <https://doi.org/10.1111/j.1469-8986.2007.00602.x>
- Gathercole, V. C. M., Thomas, E. M., Kennedy, I., Prys, C., Young, N., Guasch, N. V., Roberts, E. J., Hughes, E. K., & Jones, L. (2014). Does language dominance affect cognitive performance in bilinguals? Lifespan evidence from preschoolers through older adults on card sorting, Simon, and metalinguistic tasks. *Frontiers in Psychology*, *5*(11), 1–14. <https://doi.org/10.3389/fpsyg.2014.00011>
- Grundy, J. G. (2020). The effects of bilingualism on executive functions: an updated quantitative analysis. *Journal of Cultural Cognitive Science*, *4*(2), 177–199. <https://doi.org/10.1007/s41809-020-00062-5>
- Grundy, J. G., Anderson, J. A. E., & Bialystok, E. (2017). Neural correlates of cognitive processing in monolinguals and bilinguals. *Annals of the New York Academy of Sciences*, *February*. <https://doi.org/10.1111/nyas.13333>
- Grundy, J. G., Chung-Fat-Yim, A., Friesen, D. C., Mak, L., & Bialystok, E. (2017). Sequential congruency effects reveal differences in disengagement of attention for monolingual and bilingual young adults. *Cognition*, *163*, 42–55. <https://doi.org/10.1016/j.cognition.2017.02.010>
- Grützmann, R., Riesel, A., Klawohn, J., Kathmann, N., & Endrass, T. (2014). Complementary modulation of N2 and CRN by conflict frequency. *Psychophysiology*, *51*, 761–772. <https://doi.org/10.1111/psyp.12222>
- Gullifer, J. W., Chai, X. J., Whitford, V., Pivneva, I., Baum, S., Klein, D., & Titone, D. (2018). Bilingual experience and resting-state brain connectivity: Impacts of L2 age of acquisition and social diversity of language use on control networks. *Neuropsychologia*,

117(2018), 123–134. <https://doi.org/10.1016/j.neuropsychologia.2018.04.037>

Heathcote, A., Popiel, S. J., & Mewhort, D. J. K. (1991). Analysis of response time distributions: an example using the stroop task. *Psychological Bulletin*, *109*(2), 340–347. <https://doi.org/10.1037/0033-2909.109.2.340>

Hernández, M., Costa, A., Fuentes, L. J., Vivas, A. B., & Sebastián-Gallés, N. (2010). The impact of bilingualism on the executive control and orienting networks of attention. *Bilingualism: Language and Cognition*, *13*(3), 315–325. <https://doi.org/10.1017/S1366728909990010>

Hervey, A. S., Epstein, J. N., Curry, J. F., Tonev, S., Eugene Arnold, L., Keith Conners, C., Hinshaw, S. P., Swanson, J. M., & Hechtman, L. (2006). Reaction time distribution analysis of neuropsychological performance in an ADHD sample. *Child Neuropsychology*, *12*(2), 125–140. <https://doi.org/10.1080/09297040500499081>

Hofweber, J., Marinis, T., & Treffers-Daller, J. (2016). Effects of dense code-switching on executive control. *Linguistic Approaches to Bilingualism*, *6*(5), 648–668. <https://doi.org/10.1075/sibil.57.11hof>

Jiao, L., Grundy, J. G., Liu, C., & Chen, B. (2020). Language context modulates executive control in bilinguals: Evidence from language production. *Neuropsychologia*, *142*(19). <https://doi.org/10.1016/j.neuropsychologia.2020.107441>

Johnson, R. J. (1993). On the neural generators of the P300 component of the event-related potential. *Psychophysiology*, *30*, 90–97.

Kane, M. J., & Engle, R. W. (2003). Working-Memory Capacity and the Control of Attention: The Contributions of Goal Neglect, Response Competition, and Task Set to Stroop Interference. *Journal of Experimental Psychology: General*, *132*(1), 47–70. <https://doi.org/10.1037/0096-3445.132.1.47>

Kok, A. (2001). On the utility of P3 amplitude as a measure of processing capacity. *Psychophysiology*, *38*(3), 557–577. <https://doi.org/10.1017/S0048577201990559>

Kopp, B., Fred, R., & Mattler, U. (1996). N200 in the flanker task as a neurobiological tool for investigating executive control. *Psychophysiology*, *33*, 282–294.

Kousaie, S., & Phillips, N. A. (2012). Conflict monitoring and resolution: Are two languages better than one? Evidence from reaction time and event-related brain potentials. *Brain*

- Research*, 1446(2012), 71–90. <https://doi.org/10.1016/j.brainres.2012.01.052>
- Kousaie, S., & Phillips, N. A. (2017). A behavioural and electrophysiological investigation of the effect of bilingualism on aging and cognitive control. *Neuropsychologia*, 94(July 2016), 23–35. <https://doi.org/10.1016/j.neuropsychologia.2016.11.013>
- Lehtonen, M., Soveri, A., Laine, A., Järvenpää, J., de Bruin, A., & Antfolk, J. (2018). Is bilingualism associated with enhanced executive functioning in adults? A meta-analytic review. *Psychological Bulletin*, 144(4), 394–425. <https://doi.org/10.1037/bul0000142>
- Li, P., Legault, J., & Litcofsky, K. A. (2014). Neuroplasticity as a function of second language learning: Anatomical changes in the human brain. *Cortex*, 58, 301–324. <https://doi.org/10.1016/j.cortex.2014.05.001>
- Luk, G., Anderson, J. A. E., Craik, F. I. M., Grady, C. L., & Bialystok, E. (2010). Distinct neural correlates for two types of inhibition in bilinguals: Response inhibition versus interference suppression. *Brain and Cognition*, 74(3), 347–357. <https://doi.org/10.1016/j.bandc.2010.09.004>
- Marian, V., & Spivey, M. (2003). Competing activation in bilingual language processing: Within- and between-language competition. *Bilingualism: Language and Cognition*, 6(2), 97–115. <https://doi.org/10.1017/s1366728903001068>
- Maris, E., & Oostenveld, R. (2007). Nonparametric statistical testing of EEG- and MEG-data. *Journal of Neuroscience Methods*, 164(1), 177–190. <https://doi.org/10.1016/j.jneumeth.2007.03.024>
- Martin, C. D., Dering, B., Thomas, E. M., & Thierry, G. (2009). Brain potentials reveal semantic priming in both the ‘active’ and the ‘non-attended’ language of early bilinguals. *NeuroImage*, 47, 326–333. <https://doi.org/10.1016/j.neuroimage.2009.04.025>
- Matzke, D., & Wagenmakers, E. J. (2009). Psychological interpretation of the ex-gaussian and shifted wald parameters: A diffusion model analysis. *Psychonomic Bulletin and Review*, 16(5), 798–817. <https://doi.org/10.3758/PBR.16.5.798>
- Morales, J., Yudes, C., Gomez-Ariza, C. J., & Bajo, M. T. (2015). Bilingualism modulates dual mechanisms of cognitive control: Evidence from ERPs. *Neuropsychologia*, 66, 157–169. <https://doi.org/10.1016/j.neuropsychologia.2014.11.014>
- Moreno, S., Wodniecka, Z., Tays, W., Alain, C., & Bialystok, E. (2014). Inhibitory Control



- in Bilinguals and Musicians: Event Related Potential (ERP) Evidence for Experience-Specific Effects. *PLoS ONE*, 9(4), e94169. <https://doi.org/10.1371/journal.pone.0094169>
- Naeem, K., Filippi, R., Periche-Tomas, E., Papageorgiou, A., & Bright, P. (2018). The importance of socioeconomic status as a modulator of the bilingual advantage in cognitive ability. *Frontiers in Psychology*, 9(1818), 1–9. <https://doi.org/10.3389/fpsyg.2018.01818>
- Nichols, E. S., Wild, C. J., Stojanoski, B., Battista, M. E., & Owen, A. M. (2020). Bilingualism Affords No General Cognitive Advantages: A Population Study of Executive Function in 11,000 People. *Psychological Science*, 31(5), 548–567. <https://doi.org/10.1177/0956797620903113>
- Oldfield, R. C. (1971). The assessment and analysis of handedness: The Edinburgh inventory. *Neuropsychologia*, 9, 97–113. [https://doi.org/10.1007/978-0-387-79948-3\\_6053](https://doi.org/10.1007/978-0-387-79948-3_6053)
- Oostenveld, R., Fries, P., Maris, E., & Schoffelen, J. M. (2011). FieldTrip: Open source software for advanced analysis of MEG, EEG, and invasive electrophysiological data. *Computational Intelligence and Neuroscience*, 2011, 1–9. <https://doi.org/10.1155/2011/156869>
- Oostenveld, R., & Praamstra, P. (2001). The five percent electrode system for high-resolution EEG and ERP measurements. *Clinical Neurophysiology*, 112(4), 713–719. [https://doi.org/10.1016/S1388-2457\(00\)00527-7](https://doi.org/10.1016/S1388-2457(00)00527-7)
- Paap, K. R., & Greenberg, Z. I. (2013). There is no coherent evidence for a bilingual advantage in executive processing. *Cognitive Psychology*, 66(2), 232–258. <https://doi.org/10.1016/j.cogpsych.2012.12.002>
- Paap, K. R., Johnson, H. A., & Sawi, O. (2015). Bilingual advantages in executive functioning either do not exist or are restricted to very specific and undetermined circumstances. *Cortex*, 69, 265–278. <https://doi.org/10.1016/j.cortex.2015.04.014>
- Paap, K. R., & Sawi, O. (2014). Bilingual advantages in executive functioning: problems in convergent validity, discriminant validity, and the identification of the theoretical constructs. *Frontiers in Psychology*, 5(962), 1–15. <https://doi.org/10.3389/fpsyg.2014.00962>
- Pliatsikas, C., & Luk, G. (2016). Executive control in bilinguals: A concise review on fMRI

studies. *Bilingualism: Language and Cognition*, 19(4), 699–705.

<https://doi.org/10.1017/S1366728916000249>

Poarch, G. J., & Krott, A. (2019). A bilingual advantage? An appeal for a change in perspective and recommendations for future research. *Behavioral Sciences*, 9(9), 1–9.

<https://doi.org/10.3390/bs9090095>

Polich, J. (2007). Updating P300: An integrative theory of P3a and P3b. *Clinical Neurophysiology*, 118(10), 2128–2148. <https://doi.org/10.1016/j.clinph.2007.04.019>

Purmann, S., Badde, S., Luna-Rodriguez, A., & Wendt, M. (2011). Adaptation to frequent conflict in the eriksen flanker task: An ERP study. *Journal of Psychophysiology*, 25, 50–59.

Raven, J. C. (1958). *Standard Progressive Matrices. Sets A, B, C, D, and E*. London: H.K. Lewis & Co. Ltd.

Spieler, D. H., Balota, D. A., & Faust, M. E. (1996). Stroop Performance in Healthy Younger and Older Adults and in Individuals with Dementia of the Alzheimer's Type. *Journal of Experimental Psychology: Human Perception and Performance*, 22(2), 461–479.

<https://doi.org/10.1037/0096-1523.22.2.461>

Spieler, D. H., Balota, D. A., & Faust, M. E. (2000). Levels of selective attention revealed through analyses of response time distributions. *Journal of Experimental Psychology: Human Perception and Performance*, 26(2), 506–526. <https://doi.org/10.1037/0096-1523.26.2.506>

Spivey, M. J., & Marian, V. (1999). Cross talk between native and second languages: Partial Activation of an Irrelevant Lexicon. *Psychological Science*, 10(3), 281–284.

<https://doi.org/10.1111/1467-9280.00151>

Sullivan, M. D., Janus, M., Moreno, S., Astheimer, L., & Bialystok, E. (2014). Early stage second-language learning improves executive control: Evidence from ERP. *Brain and Language*, 139, 84–98. <https://doi.org/10.1016/j.bandl.2014.10.004>

Tillman, C. M., & Wiens, S. (2011). Behavioral and ERP indices of response conflict in Stroop and flanker tasks. *Psychophysiology*, 48, 1405–1411.

<https://doi.org/10.1111/j.1469-8986.2011.01203.x>

Tse, C. S., & Altarriba, J. (2012). The effects of first- and second-language proficiency on

- conflict resolution and goal maintenance in bilinguals: Evidence from reaction time distributional analyses in a Stroop task. *Bilingualism: Language and Cognition*, *15*(3), 663–676. <https://doi.org/10.1017/S1366728912000077>
- Veen, V. Van, & Carter, C. S. (2002). The Timing of Action-Monitoring Processes in the Anterior Cingulate Cortex. *Journal of Cognitive Neuroscience*, *14*(4), 593–602.
- Ware, A. T., Kirkovski, M., & Lum, J. A. G. (2020). Meta-Analysis Reveals a Bilingual Advantage That Is Dependent on Task and Age. *Frontiers in Psychology*, *11*(1458), 1–21. <https://doi.org/10.3389/fpsyg.2020.01458>
- Wickens, C., Kramer, A., Vanasse, L., & Donchin, E. (1983). Performance of concurrent tasks: A psychophysiological analysis of the reciprocity of information-processing resources. *Science*, *221*(4615), 1080–1082. <https://doi.org/10.1126/science.6879207>
- Wild-Wall, N., Falkenstein, M., & Hohnsbein, J. (2008). Flanker interference in young and older participants as reflected in event-related potentials. *Brain Research*, *1211*, 72–84. <https://doi.org/10.1016/j.brainres.2008.03.025>
- Wu, Y. J., & Thierry, G. (2013). Fast modulation of executive function by language context in bilinguals. *Journal of Neuroscience*, *33*(33), 13533–13537. <https://doi.org/10.1523/JNEUROSCI.4760-12.2013>
- Yeung, N., Botvinick, M. M., & Cohen, J. D. (2004). The neural basis of error detection: Conflict monitoring and the error-related negativity. *Psychological Review*, *111*(4), 931–959. <https://doi.org/10.1037/0033-295X.111.4.931>
- Yeung, N., & Cohen, J. D. (2006). The Impact of Cognitive Deficits on Conflict Monitoring. *Psychological Science*, *17*(2), 164–171. <http://search.ebscohost.com/login.aspx?direct=true&db=aph&AN=19473526&site=ehost-live>
- Yeung, N., & Nieuwenhuis, S. (2009). Dissociating response conflict and error likelihood in anterior cingulate cortex. *Journal of Neuroscience*, *29*(46), 14506–14510. <https://doi.org/10.1523/JNEUROSCI.3615-09.2009>
- Zhang, H., Kang, C., Wu, Y., Ma, F., & Guo, T. (2015). Improving proactive control with training on language switching in bilinguals. *NeuroReport*, *26*(6), 354–359. <https://doi.org/10.1097/WNR.0000000000000353>

Zhou, B., & Krott, A. (2016). Data trimming procedure can eliminate bilingual cognitive advantage. *Psychonomic Bulletin & Review*, 23(4), 1221–1230.  
<https://doi.org/10.3758/s13423-015-0981-6>

Zhou, B., & Krott, A. (2018). Bilingualism enhances attentional control in non-verbal conflict tasks – evidence from ex-Gaussian analyses. *Bilingualism: Language and Cognition*, 21(1), 162–180. <https://doi.org/10.1017/S1366728916000869>
